# Supplementary material for: Harnessing the potential of chloroplast-derived expression elements for enhanced production of cellulases in Escherichia coli
Source: PeerJ. 2025 Jan 31;13:e18616. doi: 10.7717/peerj.18616 (PMC11789652; doi:10.7717/peerj.18616)
Supplement: Supplemental Information 1 [file peerj-13-18616-s001.xlsx]

## Sheet: Expression levels
Relative quantification of Expression levels in E coli
Enzyme Prep	Replictae	Band intensity	Percent
BETA-S	1	26916.6	49.8557
BETA-S	2	29442.8	50.5632
BETA-S	3	31980.2	53.553
BETA-IS	1	4631.15	8.57798
BETA-IS	2	4994.15	8.57662
BETA-IS	3	4823.91	8.07797
ENDO-S	1	17412.9	32.2528
ENDO-S	2	19485.8	33.4636
ENDO-S	3	19256.6	32.2464
ENDO-IS	1	5028.23	9.31345
ENDO-IS	2	4307.03	7.39661
ENDO-IS	3	3656.2	6.12256

## Sheet: pNP Assay (Betaglucosidase)
pNPG standard curve
Slope		0.010894
y-intercept		0.019812
Standard	1/slope	91.7951
Concentration of pNP released (µM) =		(y-c)/m
Enzyme Activity(μmol/min ml) or (U/ml) = (Concentration of product of reaction) (μmol /ml) ×Total Reaction Volume (ml) / [(Reaction time (min)) × (Enzyme volume(ml))]
			Total reaction volume= 3ml
			Reaction Time=30 min
			Enzyme Volume=0.1 ml
Soluble							Insoluble
Enzyme Prep	Temp (ºC)	Replicate	Absorbance 410	pNP (µM)	Enzyme Activity		Enzyme Prep	Temp (ºC)	Replicate	Absorbance 410	pNP (µM)	Enzyme Activity
BETA-S	50	1	1.063	95.758	95.758		BETA-IS	50	1	0.154	12.3176	12.3176
BETA-S	50	2	1.062	95.6662	95.6662		BETA-IS	50	2	0.155	12.4094	12.4094
BETA-S	50	3	1.064	95.8498	95.8498		BETA-IS	50	3	0.156	12.5012	12.5012
BETA-S	70	1	1.288	116.412	116.412		BETA-IS	70	1	0.261	22.1395	22.1395
BETA-S	70	2	1.287	116.32	116.32		BETA-IS	70	2	0.263	22.3231	22.3231
BETA-S	70	3	1.283	115.953	115.953		BETA-IS	70	3	0.26	22.0477	22.0477
BETA-S	80	1	1.38	124.857	124.857		BETA-IS	80	1	0.295	25.2605	25.2605
BETA-S	80	2	1.378	124.673	124.673		BETA-IS	80	2	0.294	25.1687	25.1687
BETA-S	80	3	1.376	124.489	124.489		BETA-IS	80	3	0.296	25.3523	25.3523
BETA-S	90	1	1.494	135.321	135.321		BETA-IS	90	1	0.343	29.6666	29.6666
BETA-S	90	2	1.493	135.229	135.229		BETA-IS	90	2	0.347	30.0338	30.0338
BETA-S	90	3	1.492	135.138	135.138		BETA-IS	90	3	0.345	29.8502	29.8502
BETA-S	100	1	1.415	128.069	128.069		BETA-IS	100	1	0.312	26.821	26.821
BETA-S	100	2	1.412	127.794	127.794		BETA-IS	100	2	0.316	27.1882	27.1882
BETA-S	100	3	1.415	128.069	128.069		BETA-IS	100	3	0.308	26.4538	26.4538
BETA-S	110	1	1.367	123.663	123.663		BETA-IS	110	1	0.297	25.4441	25.4441
BETA-S	110	2	1.368	123.755	123.755		BETA-IS	110	2	0.299	25.6277	25.6277
BETA-S	110	3	1.366	123.572	123.572		BETA-IS	110	3	0.295	25.2605	25.2605

## Sheet: DNS Assay (Endoglucanase)
	Standard factor	2.113
	Dilution factor	1
	Reaction volume	2.1 ml
	Enzyme volume	0.2 ml
	Incubation time	30 min
	QRM	0.5 ml
	Enzyme Prep	Temp (ºC)	Replicate	Absorbance (530 nm)	Enzyme Activity
	ENDO-S	50	1	0.563	0.832733
	ENDO-S	50	2	0.562	0.831254
	ENDO-S	50	3	0.564	0.834212
	ENDO-S	70	1	0.738	1.09158
	ENDO-S	70	2	0.739	1.09305
	ENDO-S	70	3	0.737	1.0901
	ENDO-S	80	1	0.923	1.36521
	ENDO-S	80	2	0.921	1.36225
	ENDO-S	80	3	0.925	1.36817
	ENDO-S	90	1	1.22	1.8045
	ENDO-S	90	2	1.24	1.83408
	ENDO-S	90	3	1.26	1.86367
	ENDO-S	100	1	1.84	2.72154
	ENDO-S	100	2	1.841	2.72302
	ENDO-S	100	3	1.839	2.72006
	ENDO-S	110	1	1.56	2.3074
	ENDO-S	110	2	1.54	2.27781
	ENDO-S	110	3	1.58	2.33698
	ENDO-IS	50	1	0.342	0.505852
	ENDO-IS	50	2	0.344	0.50881
	ENDO-IS	50	3	0.343	0.507331
	ENDO-IS	70	1	0.523	0.773569
	ENDO-IS	70	2	0.525	0.776528
	ENDO-IS	70	3	0.524	0.775048
	ENDO-IS	80	1	0.636	0.940708
	ENDO-IS	80	2	0.635	0.939229
	ENDO-IS	80	3	0.637	0.942187
	ENDO-IS	90	1	0.842	1.2454
	ENDO-IS	90	2	0.84	1.24244
	ENDO-IS	90	3	0.844	1.24836
	ENDO-IS	100	1	1.12	1.65659
	ENDO-IS	100	2	1.121	1.65807
	ENDO-IS	100	3	1.119	1.65511
	ENDO-IS	110	1	0.986	1.45839
	ENDO-IS	110	2	0.988	1.46135
	ENDO-IS	110	3	0.987	1.45987
	S =	Soluble
	IS =	Insoluble

## Sheet: Thermostability
Thermostability exp
Enzyme	Time (min)	Replicate	Absorbance (410 nm)	% Activity
BETA	0	1	1.493	100
BETA	0	2	1.49	100
BETA	0	3	1.491	100
BETA	5	1	1.559	104.421
BETA	5	2	1.558	104.564
BETA	5	3	1.558	104.494
BETA	10	1	1.579	105.76
BETA	10	2	1.576	105.772
BETA	10	3	1.578	105.835
BETA	15	1	1.545	103.483
BETA	15	2	1.542	103.49
BETA	15	3	1.545	103.622
BETA	20	1	1.717	115.003
BETA	20	2	1.708	114.631
BETA	20	3	1.712	114.822
BETA	25	1	2.252	150.837
BETA	25	2	2.222	149.128
BETA	25	3	2.246	150.637
BETA	30	1	1.769	118.486
BETA	30	2	1.766	118.523
BETA	30	3	1.768	118.578
BETA	35	1	1.644	110.114
BETA	35	2	1.647	110.537
BETA	35	3	1.644	110.262
BETA	40	1	1.292	86.5372
BETA	40	2	1.29	86.5772
BETA	40	3	1.291	86.5862
BETA	45	1	1.51	101.139
BETA	45	2	1.514	101.611
BETA	45	3	1.512	101.408
BETA	50	1	1.154	77.294
BETA	50	2	1.158	77.7181
BETA	50	3	1.156	77.5319
BETA	55	1	1.045	69.9933
BETA	55	2	1.048	70.3356
BETA	55	3	1.046	70.1543
BETA	60	1	1.273	85.2646
BETA	60	2	1.268	85.1007
BETA	60	3	1.27	85.1777
ENDO	0	1	1.88	100
ENDO	0	2	1.86	100
ENDO	0	3	1.87	100
ENDO	5	1	1.912	101.702
ENDO	5	2	1.915	102.957
ENDO	5	3	1.914	102.353
ENDO	10	1	1.944	103.404
ENDO	10	2	1.949	104.785
ENDO	10	3	1.945	104.011
ENDO	15	1	1.928	102.553
ENDO	15	2	1.931	103.817
ENDO	15	3	1.93	103.209
ENDO	20	1	1.966	104.574
ENDO	20	2	1.968	105.806
ENDO	20	3	1.967	105.187
ENDO	25	1	1.985	105.585
ENDO	25	2	1.987	106.828
ENDO	25	3	1.988	106.31
ENDO	30	1	2.118	112.66
ENDO	30	2	2.123	114.14
ENDO	30	3	2.127	113.743
ENDO	35	1	1.914	101.809
ENDO	35	2	1.916	103.011
ENDO	35	3	1.915	102.406
ENDO	40	1	1.922	102.234
ENDO	40	2	1.924	103.441
ENDO	40	3	1.923	102.834
ENDO	45	1	1.972	104.894
ENDO	45	2	1.974	106.129
ENDO	45	3	1.973	105.508
ENDO	50	1	1.534	81.5957
ENDO	50	2	1.539	82.7419
ENDO	50	3	1.537	82.1925
ENDO	55	1	1.495	79.5213
ENDO	55	2	1.494	80.3226
ENDO	55	3	1.496	80
ENDO	60	1	1.437	76.4362
ENDO	60	2	1.436	77.2043
ENDO	60	3	1.435	76.738

## Sheet: Kinetics_BETA
								Enzyme Kinetics Of β-glucosidase
											Assay conditions:
			pNPG (µM)	Rep	OD	U/ml	U/mg				pH= 4.8
			20	1	0.214	8.91261	32.0022				Enzyme=	100 µL
			40	1	0.259	10.978	39.4182				time=	60 min
			60	1	0.444	19.4689	69.9062				Total Reaction Mixture	3 ml
			80	1	0.591	22.544	80.9478
			100	1	0.758	33.8805	121.653				Temp=90 ºC
			150	1	0.895	40.1683	144.231
			200	1	1.169	52.7441	189.386				b-glucosidase-protein estimation
			400	1	1.364	61.694	221.522
			600	1	1.361	61.5563	221.028				sample (vol)	OD 595	µ gram/ml	mg/ml
			800	1	1.385	62.6578	224.983				100 µL	1.062	278.521	0.278521
			1000	1	1.433	64.8608	232.894
			20	2	0.226602	9.491	34.079				slope=	0.03813
			40	2	0.280832	11.98	43.0162				Protein standard factor	26.2261
			60	2	0.481064	21.17	76.0144
			80	2	0.517668	22.85	82.0467
			100	2	0.802916	35.942	129.056
			150	2	1.03339	46.52	167.038
			200	2	1.30095	58.8	211.131
			400	2	1.39117	62.941	226
			600	2	1.48222	67.12	241.005
			800	2	1.42152	64.334	231.002				B-glucosidase
			1000	2	1.48222	67.12	241.005					Kcat= Vmax/[E]
			20	3	0.232201	9.748	35.0018				Direct Fit using GraphPad Prism
			40	3	0.268631	11.42	41.0054				Vmax=	283.5	U mg-1 min-1
			60	3	0.493113	21.723	78				km=	0.1363	mM
			80	3	0.52952	23.394	84				Vmax/Km	2079.97
			100	3	0.814714	36.4835	131				Kcat	14742	min-1
			150	3	0.942142	42.332	152				Kcat	245.7	s-1
			200	3	1.32443	59.878	215.002				Kcat/km	1802.64
			400	3	1.43366	64.891	233.002
			600	3	1.39117	62.941	226
			800	3	1.43366	64.891	233.002
			1000	3	1.46403	66.285	238.007

## Sheet: Kinetics_ENDO
							Enzyme Kinetics Of Endoglucanase
		CMC%w/v	Rep	OD	U/ml	U/mg				Assay conditions:
		0.05	1	0.007	0.00246517	0.0109466				pH = 4.0 (Sodium Acetate)
		0.08	1	0.039	0.0137345	0.060988				Temp = 90 ºC
		0.1	1	0.075	0.0264125	0.117285
		0.15	1	0.092	0.0323993	0.143869				Endoglucanase-protein estimation
		0.2	1	0.122	0.0429643	0.190783				sample (vol)	OD 595	µ gram/ml	mg/ml
		0.23	1	0.145	0.0510642	0.22675				100 µL	0.859	225.282	0.225282
		0.25	1	0.168	0.059164	0.262718
		0.28	1	0.219	0.0771245	0.342471				slope=	0.03813
		0.3	1	0.268	0.0943807	0.419097				Protein standard factor	26.2261
		0.4	1	0.327	0.115158	0.511361
		0.5	1	0.381	0.134175	0.595806
		0.6	1	0.437	0.153897	0.683378
		0.8	1	0.679	0.239121	1.06182
		1	1	0.865	0.304624	1.35268
		1.25	1	1.383	0.487046	2.16273
		1.5	1	1.466	0.516276	2.29252
		1.75	1	1.502	0.528954	2.34882
		2	1	1.72	0.605727	2.68973
		2.5	1	2.14	0.753637	3.34652
		2.75	1	2.283	0.803996	3.57014				Kcat= Vmax/[E]
		3	1	2.31514	0.815315	3.62041
		0.05	2	0.0118	0.00415557	0.0184528				Direct Fit using GraphPad Prism
		0.08	2	0.039	0.0137345	0.060988				Vmax=	16.1	U mg-1 min-1
		0.1	2	0.0748	0.0263421	0.116972				km=	96	mg ml-1
		0.15	2	0.0913	0.0321528	0.142774				Vmax/Km	0.167708
		0.2	2	0.121	0.0426122	0.189219				Kcat	483	min-1
		0.23	2	0.18	0.06339	0.281483				Kcat	8.05	sec-1
		0.25	2	0.186	0.065503	0.290866				Kcat/km	0.0838542
		0.28	2	0.217	0.0764202	0.339344
		0.3	2	0.266	0.0936763	0.41597
		0.4	2	0.324	0.114102	0.50667
		0.5	2	0.378	0.133119	0.591115
		0.6	2	0.433	0.152488	0.677123
		0.8	2	0.886	0.31202	1.38552
		1	2	1.01	0.355688	1.57943
		1.25	2	1.37	0.482468	2.1424
		1.5	2	1.554	0.547267	2.43014
		1.75	2	1.6	0.563467	2.50207
		2	2	1.895	0.667356	2.96339
		2.5	2	2.12	0.746593	3.31525
		2.75	2	2.336	0.822661	3.65303
		3	2	2.295	0.808222	3.58891
		0.05	3	0.0094	0.00331037	0.0146997
		0.08	3	0.03863	0.0136042	0.0604094
		0.1	3	0.0748	0.0263421	0.116972
		0.15	3	0.091	0.0320472	0.142305
		0.2	3	0.121	0.0426122	0.189219
		0.23	3	0.185	0.0651508	0.289302
		0.25	3	0.206	0.0725463	0.322142
		0.28	3	0.215	0.0757158	0.336216
		0.3	3	0.266	0.0936763	0.41597
		0.4	3	0.3236	0.113961	0.506044
		0.5	3	0.3775	0.132943	0.590333
		0.6	3	0.433	0.152488	0.677123
		0.8	3	0.889	0.313076	1.39021
		1	3	1.045	0.368014	1.63417
		1.25	3	1.37	0.482468	2.1424
		1.5	3	1.57	0.552902	2.45516
		1.75	3	1.717	0.60467	2.68504
		2	3	1.897	0.66806	2.96652
		2.5	3	2.12	0.746593	3.31525
		2.75	3	2.4	0.8452	3.75311
		3	3	2.294	0.80787	3.58735
